# Supplementary material
Source: ML conference proceedings conference paper supplement (https://openreview.net/forum?id=5YRw1m6GSz)

Performance on Cora with clients\_10

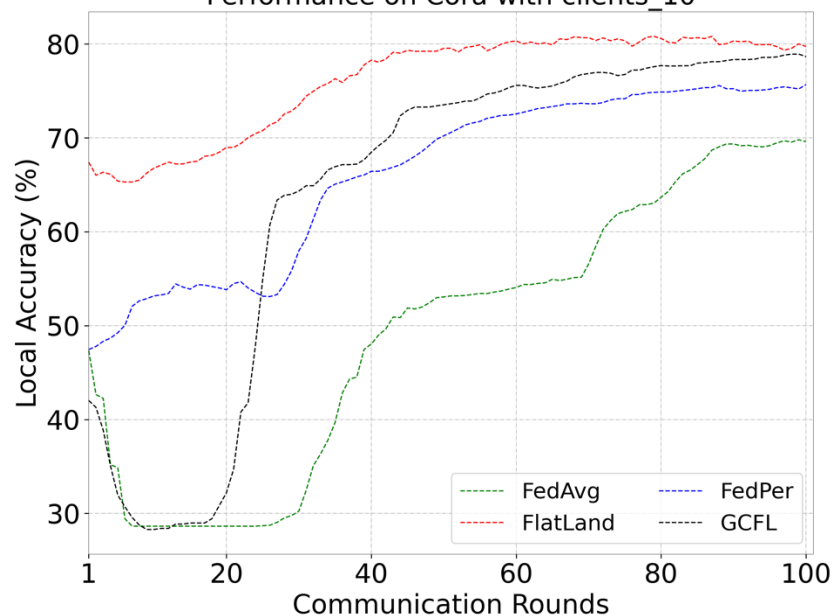

Performance on CiteSeer with clients\_10

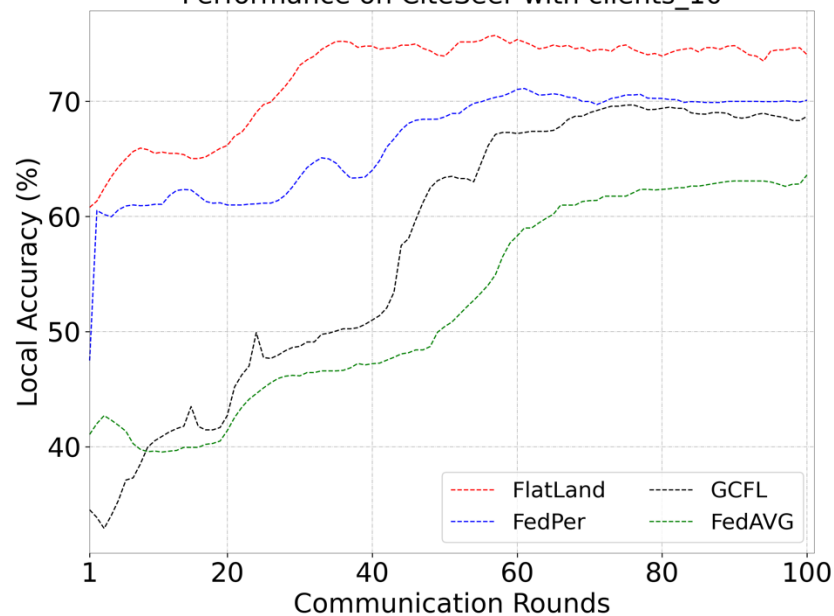

Performance on ogbn-arxiv with clients\_10

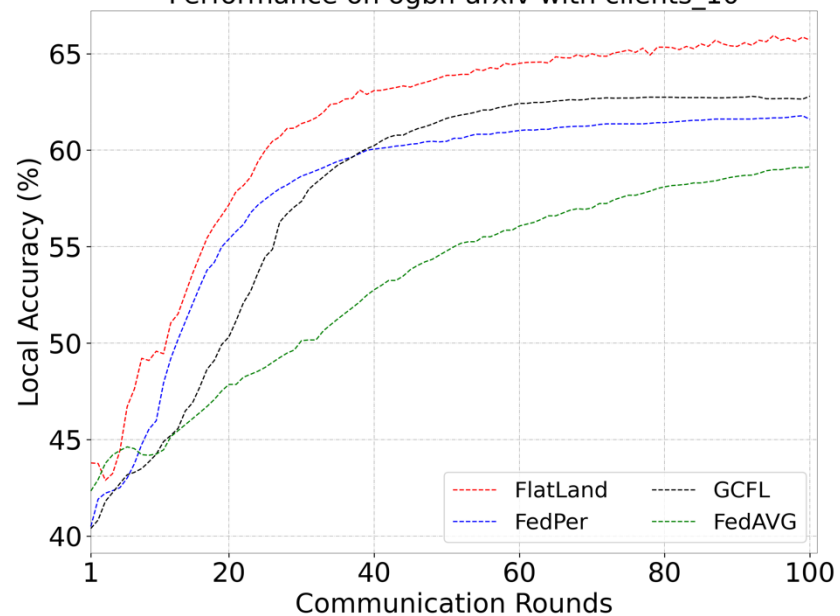

Performance on Photo with clients\_10

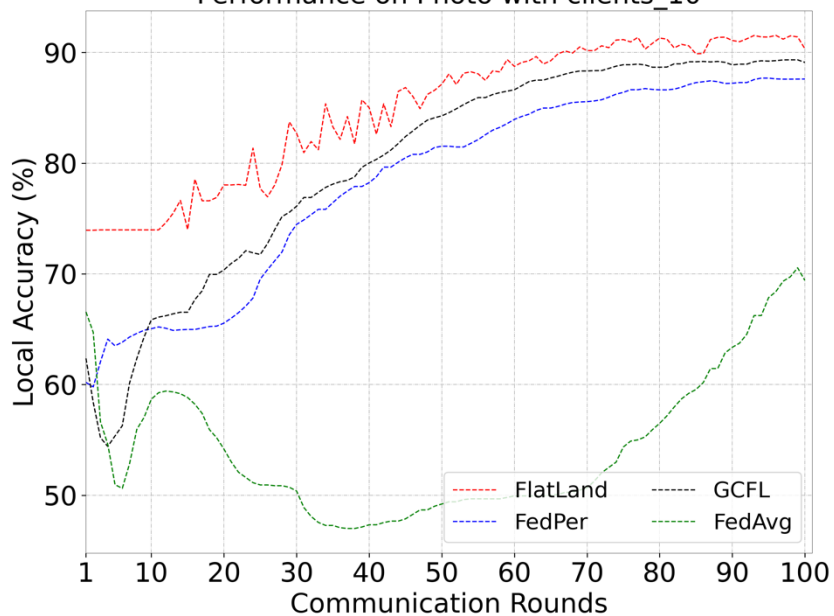

Supplement: supplementary_material [file attachment]
